# Supplementary material for: Peptidylarginine Deiminases Post-Translationally Deiminate Prohibitin and Modulate Extracellular Vesicle Release and MicroRNAs in Glioblastoma Multiforme
Source: PubMed Central journal article supplement (PMC6337164; doi:10.3390/ijms20010103), 2018-12-28
Supplement: ijms-20-00103-s001.pdf [file ijms-20-00103-s001.pdf]

**Table S1.** Deiminated protein candidates identified by LC-MS/LS in LN18 and LN229 cells. Immunoprecipitated proteins from LN18 and LN229 cell protein extract, using the F95 pan-deimination antibody, were subjected to LC-MS/MS analysis and peak list files submitted to MASCOT; identified deiminated mitochondrial, nuclear, cytoskeletal, EV-related, stress-related and invadopodia-related proteins are shown. The m/z values, peptide sequences and scores are indicated.

| Deiminated Target Proteins    | GBM line | Symbol              | m/z      | Peptide sequence      | Score <sup>1</sup> |                    |          |                  |     |
|-------------------------------|----------|---------------------|----------|-----------------------|--------------------|--------------------|----------|------------------|-----|
| <i>Mitochondrial Proteins</i> |          |                     |          |                       |                    |                    |          |                  |     |
| Prohibitin (PHB)              | LN18     | C9JW96 C9JW96_HUMAN | 531.2761 | K.AAIISAEGDSK.A       | 124                |                    |          |                  |     |
|                               |          |                     | 575.2974 | R.FDAGELITQR.E        |                    |                    |          |                  |     |
|                               | LN229    | C9JW96 C9JW96_HUMAN | 531.2780 | K.AAIISAEGDSK.A       | 55                 |                    |          |                  |     |
| Prohibitin-2 (PHB-2)          | LN18     | J3KPX7 J3KPX7_HUMAN | 605.8726 | R.VLPSIVNEVLK.S       | 55                 |                    |          |                  |     |
|                               |          |                     | 862.4641 | R.IPWFQYPIIYDIR.A     |                    |                    |          |                  |     |
|                               | LN229    | J3KPX7 J3KPX7_HUMAN | 450.2871 | R.AQVSLLR.R           | 282                |                    |          |                  |     |
|                               |          |                     | 491.2478 | R.EYTAAVEAK.Q         |                    |                    |          |                  |     |
|                               |          |                     | 605.8754 | R.VLPSIVNEVLK.S       |                    |                    |          |                  |     |
|                               |          |                     | 608.3143 | K.IVQAEGEAEAAK.M      |                    |                    |          |                  |     |
|                               |          |                     | 618.6671 | R.IGGVQQDTILAEGLHFR.I |                    |                    |          |                  |     |
| Stress-70 protein             | LN18     | P38646 GRP75_HUMAN  | 451.2270 | K.VLENAEGAR.T         | 635                |                    |          |                  |     |
|                               |          |                     | 479.7500 | K.LFEMAYK.K           |                    |                    |          |                  |     |
|                               |          |                     | 489.7293 | K.AMQDAEVSK.S         |                    |                    |          |                  |     |
|                               |          |                     | 616.3336 | R.QAASSLQQASLK.L      |                    |                    |          |                  |     |
|                               |          |                     | 645.8422 | K.VQQTVQDLFGR.A       |                    |                    |          |                  |     |
|                               |          |                     | 681.3731 | R.AQFEGIVTDLIR.R      |                    |                    |          |                  |     |
|                               |          |                     | 723.8834 | K.SDIGEVILVGGMTR.M    |                    |                    |          |                  |     |
|                               |          |                     | 725.8597 | R.TTPSVVAFTADGER.L    |                    |                    |          |                  |     |
|                               |          |                     | 784.8870 | R.QAVTNPNTFYATK.R     |                    |                    |          |                  |     |
|                               |          |                     | 823.4401 | R.VINEPTAAALAYGLDK.S  |                    |                    |          |                  |     |
|                               |          |                     | 619.6373 | R.VEAVNMAEGIIHDTETK.M |                    |                    |          |                  |     |
|                               |          |                     |          | LN229                 |                    | P38646 GRP75_HUMAN | 616.3348 | R.QAASSLQQASLK.L | 444 |
|                               |          |                     |          |                       |                    |                    | 645.8431 | K.VQQTVQDLFGR.A  |     |
|                               |          |                     | 681.3743 | R.AQFEGIVTDLIR.R      |                    |                    |          |                  |     |
|                               |          |                     | 723.8840 | K.SDIGEVILVGGMTR.M    |                    |                    |          |                  |     |
|                               |          |                     | 725.8611 | R.TTPSVVAFTADGER.L    |                    |                    |          |                  |     |
| ATP-synthase subunit alpha    | LN18     | P25705 ATPA_HUMAN   | 430.7536 | R.QMSLLLR.R           | 588                |                    |          |                  |     |
|                               |          |                     | 513.7995 | K.AVDSLVPGR.G         |                    |                    |          |                  |     |
|                               |          |                     | 586.3180 | R.VVDALGNAIDGK.G      |                    |                    |          |                  |     |
|                               |          |                     | 644.3478 | K.HALIIYDDLK.Q        |                    |                    |          |                  |     |
|                               |          |                     | 658.8727 | K.TSLAIDTIINQK.R      |                    |                    |          |                  |     |
|                               |          |                     | 712.3372 | K.TGTAEMSSILEER.I     |                    |                    |          |                  |     |

|               |       |                   |          |                              |     |
|---------------|-------|-------------------|----------|------------------------------|-----|
|               |       |                   | 518.5830 | R.EAYPGDVFYLHSR.L            |     |
|               |       |                   | 788.3942 | R.ILGADTSVDLEETGR.V          |     |
|               |       |                   | 812.9460 | R.TGAIVDVPVGEELLGR.V         |     |
|               | LN229 | P25705 ATPA_HUMAN | 408.2346 | R.ELIIGDR.Q                  | 366 |
|               |       |                   | 430.7546 | R.QMSLLLR.R                  |     |
|               |       |                   | 586.3190 | R.VVDALGNAIDGK.G             |     |
|               |       |                   | 658.8745 | K.TSIAIDTIINQK.R             |     |
|               |       |                   | 518.5842 | R.EAYPGDVFYLHSR.L            |     |
|               |       |                   | 788.3964 | R.ILGADTSVDLEETGR.V          |     |
|               |       |                   | 812.9473 | R.TGAIVDVPVGEELLGR.V         |     |
| Cytochrome C1 | LN18  | P08574 CY1_HUMAN  | 455.7251 | K.DVCTFLR.W                  | 346 |
|               |       |                   | 649.8550 | R.WASEPEHDHR.K               |     |
|               |       |                   | 421.8531 | R.GLLSSLDHTSIR.R             |     |
|               |       |                   | 760.8536 | R.HLVGVICYTEDEAK.E           |     |
|               |       |                   | 638.9818 | K.LFDYFPKYPNSEAAR.A          |     |
|               |       |                   | 885.4209 | R.HGGEDYVFSLLTGYCEPPTGVSLR.E |     |
|               | LN229 | P08574 CY1_HUMAN  | 455.7262 | K.DVCTFLR.W                  | 122 |
|               |       |                   | 433.5732 | R.GLLSSLDHTSIR.R             |     |
|               |       |                   | 885.4202 | R.HGGEDYVFSLLTGYCEPPTGVSLR.E |     |

### *Histone Proteins*

|                         |       |                     |          |                             |     |
|-------------------------|-------|---------------------|----------|-----------------------------|-----|
| Histone H2B             | LN229 | U3KQK0 U3KQK0_HUMAN | 408.7322 | R.EIQTAVR.L                 | 97  |
|                         |       |                     | 872.4112 | K.AMGIMNSFVNDIFER.I         |     |
| Histone H3              | LN229 | B4DEB1 B4DEB1_HUMAN | 416.2502 | K.STELLIR.K                 | 30  |
| Histone H4              | LN229 | P62805 H4_HUMAN     | 495.2927 | K.VFLENVIR.D                | 100 |
|                         |       |                     | 590.8132 | R.ISGLIYEETR.G              |     |
| Histone deacetylase 1   | LN18  | Q13547 HDAC1_HUMAN  | 474.7506 | R.VMTVSFHK.Y                | 399 |
|                         |       |                     | 579.7998 | R.ISICSSDKR.I               |     |
|                         |       |                     | 533.2690 | K.YYAVNYPLR.D               |     |
|                         |       |                     | 687.8176 | K.YGEYFPGTGDLR.D            |     |
|                         |       |                     | 476.2243 | R.SIRPDNMSEYSK.Q            |     |
|                         |       |                     | 681.9890 | R.DGIDDESIEAIFKPVMSK.V      |     |
|                         |       |                     | 745.0198 | K.LHISPSNMTNQNTNEYLEK.I     |     |
|                         |       |                     | 838.3850 | K.VMEMFQPSAVVLQCGSDSLSGDR.L |     |
| Histone deacetylase 2   | LN229 | H3BM24 H3BM24_HUMAN | 476.2258 | R.SIRPDNMSEYSK.Q            | 32  |
| Histone H1x             | LN18  | P38646 GRP75_HUMAN  | 604.3365 | K.YSQLVVETIR.R              | 47  |
|                         | LN229 | P38646 GRP75_HUMAN  | 473.2543 | K.AGGSAAALSPSK.K            | 163 |
|                         |       |                     | 604.3365 | K.YSQLVVETIR.R              |     |
| Histone-binding protein | LN18  | Q09028 RBBP4_HUMAN  | 487.2760 | K.TVALWDLR.N                | 177 |
|                         |       |                     | 736.3688 | K.TPSSDVLVFDYTK.H           |     |
|                         |       |                     | 602.6111 | K.HPSKPDPSGECNPDLR.L        |     |

### *Cytoskeletal/EV-related*

|       |      |                   |          |               |     |
|-------|------|-------------------|----------|---------------|-----|
| AHNAK | LN18 | Q09666 AHNK_HUMAN | 451.2339 | K.ADVDISGPK.I | 50  |
| GAPDH | LN18 | P04406 G3P_HUMAN  | 398.2117 | K.LTGMAFR.V   | 792 |
|       |      |                   | 403.7098 | K.VGVNGFGR.I  |     |
|       |      |                   | 406.2086 | K.LTGMAFR.V   |     |

|           |       |                     |           |                                    |     |
|-----------|-------|---------------------|-----------|------------------------------------|-----|
|           |       |                     | 415.2228  | K.QASEGPLK.G                       |     |
|           |       |                     | 435.2568  | K.VIPELNGK.L                       |     |
|           |       |                     | 401.2059  | R.VVDLMAHMASK.E                    |     |
|           |       |                     | 706.3963  | R.GALQNIIPASTGAAK.A                |     |
|           |       |                     | 765.8984  | R.VPTANVSVDLTCLR.L                 |     |
|           |       |                     | 807.4508  | K.LVINGNPITIFQER.D                 |     |
|           |       |                     | 882.4014  | K.LISWYDNEFGYSNR.V                 |     |
|           |       |                     | 917.4606  | K.IISNASCTTNCLAPLAK.V              |     |
|           |       |                     | 681.3666  | K.LVINGNPITIFQERDPSK.              |     |
|           |       |                     | 743.7035  | R.VIISAPSADAPMFVMGVNHEK.Y          |     |
|           |       |                     | 759.6815  | K.WGDAGAEYVVESTGVFTTMEK.A          |     |
|           | LN229 | P04406 G3P_HUMAN    | 398.2130  | K.LTGMAFR.V                        | 881 |
|           |       |                     | 403.7110  | K.VGVNGFGR.I                       |     |
|           |       |                     | 406.2095  | K.LTGMAFR.V                        |     |
|           |       |                     | 435.2575  | K.VIPELNGK.L                       |     |
|           |       |                     | 401.2070  | R.VVDLMAHMASK.E                    |     |
|           |       |                     | 444.2208  | R.VVDLMAHMASKE                     |     |
|           |       |                     | 706.3971  | R.GALQNIIPASTGAAK.A                |     |
|           |       |                     | 765.9000  | R.VPTANVSVDLTCLR.L                 |     |
|           |       |                     | 510.9364  | R.VPTANVSVDLTCLR                   |     |
|           |       |                     | 807.4537  | K.LVINGNPITIFQER.D                 |     |
|           |       |                     | 807.9458  | K.LVINGNPITIFQER.D                 |     |
|           |       |                     | 580.6500  | R.DGRGALQNIIPASTGAAK.A             |     |
|           |       |                     | 882.4041  | K.LISWYDNEFGYSNR.V                 |     |
|           |       |                     | 588.6068  | K.LISWYDNEFGYSNR.V                 |     |
|           |       |                     | 917.4614  | K.IISNASCTTNCLAPLAK.V              |     |
|           |       |                     | 611.9775  | K.IISNASCTTNCLAPLAK.V              |     |
|           |       |                     | 681.0412  | K.LVINGNPITIFQERDPSK.I             |     |
|           |       |                     | 681.3674  | K.LVINGNPITIFQERDPSK.I             |     |
|           |       |                     | 738.3725  | R.VIISAPSADAPMFVMGVNHEK.Y          |     |
|           |       |                     | 9.6839    | K.WGDAGAEYVVESTGVFTTMEK.A          |     |
|           |       |                     | 1139.0227 | K.WGDAGAEYVVESTGVFTTMEK.A          |     |
|           |       |                     | 1009.9774 | K.GILGYTEHQVSSDFNSDTHSSTFDAGAGIAL  |     |
| Vimentin  | LN229 | P08670 VIME_HUMAN   | 457.7319  | R.SYVTTSTR.T                       | 839 |
|           |       |                     | 512.2587  | R.QQYESVAAK.N                      |     |
|           |       |                     | 530.7667  | R.QVDQLTNDK.A                      |     |
|           |       |                     | 544.7711  | R.QDVDNASLAR.L                     |     |
|           |       |                     | 547.2675  | K.FADLSEANR.N                      |     |
|           |       |                     | 585.3604  | K.ILLAELEQLK.G                     |     |
|           |       |                     | 662.3127  | R.EEAENTLQSFR.Q                    |     |
|           |       |                     | 714.8594  | R.SLYASSPGGVYATR.                  |     |
|           |       |                     | 511.9561  | R.KVESLQEEIAFLK.K                  |     |
|           |       |                     | 556.9518  | R.ETNLDLPLVDTHSK.R                 |     |
|           |       |                     | 709.3588  | R.KVESLQEEIAFLK.K                  |     |
|           |       |                     | 729.6618  | R.EMEENFAVEAANYQDTIGR.L            |     |
|           |       |                     | 981.5101  | K.LHEEEIQELQAQIQEQHVQIDVDVSKPDLTAA |     |
| Filamin-A | LN18  | Q60FE5 Q60FE5_HUMAN | 494.7725  | K.KGEITGEVR.M                      | 966 |
|           |       |                     | 544.7852  | R.TPCEEILVK.H                      |     |
|           |       |                     | 578.3112  | K.IVGPSGAAPVCK.V                   |     |

|                       |                     |                   |          |                                  |      |
|-----------------------|---------------------|-------------------|----------|----------------------------------|------|
|                       |                     |                   | 613.8287 | R.AWGPGLGGVVVK.S                 |      |
|                       |                     |                   | 613.8879 | R.LIALLEVLQK.K                   |      |
|                       |                     |                   | 656.8451 | K.VEPGLGADNSVVR.F                |      |
|                       |                     |                   | 713.8787 | R.EAGAGGLAIAVEGPSK.A             |      |
|                       |                     |                   | 717.8618 | R.ANLPQSFQVDTSK.A                |      |
|                       |                     |                   | 750.8782 | K.DAGEGGLSLAIEGPSK.A             |      |
|                       |                     |                   | 501.5928 | R.FVPAEMGHTVSVK.Y                |      |
|                       |                     |                   | 785.9052 | R.GAGTGGLGLAVEGPSEAK.M           |      |
|                       |                     |                   | 530.2515 | R.YAPSEAGLHEMDIR.Y               |      |
|                       |                     |                   | 534.9257 | K.YNEQHVPSPFTAR.V                |      |
|                       |                     |                   | 549.6287 | K.TGVAVNKPAEFTVDAK.H             |      |
|                       |                     |                   | 826.9316 | K.VTAQCPGLEPSGNIANK.T            |      |
|                       |                     |                   | 425.4830 | R.TGVELGKPTHFTVNAK.A             |      |
|                       |                     |                   | 605.6562 | K.VAQPTITDNKDGTVTVR.Y            |      |
|                       |                     |                   | 762.7270 | K.YTPVQQGPVGVNVTYGGDPPIK.S       |      |
|                       |                     |                   | 771.7021 | R.SAGQGEVLVYVEDPAGHQEEAK.V       |      |
|                       |                     |                   | 846.0536 | R.YWPQEAGEYAVHVLCSNEDIR.L        |      |
|                       |                     |                   | 899.1047 | K.SADFVVEAIGDDVGLGFSVEGPSQAK.I   |      |
|                       |                     |                   | 982.5008 | R.FGGEHVPNSPFQVTALAGDQPSVQPPLR.S |      |
| LN229                 | Q60FE5 Q60FE5_HUMAN |                   | 395.7259 | K.VYGPVAK.T                      | 804  |
|                       |                     |                   | 554.7907 | K.RAEFTVETR.S                    |      |
|                       |                     |                   | 412.8945 | K.KRAEFTVETR.S                   |      |
|                       |                     |                   | 708.3760 | R.IANLQTDLSDGLR.L                |      |
|                       |                     |                   | 717.3572 | R.AYGPGIEPTGNMVK.K               |      |
|                       |                     |                   | 521.2731 | R.AYGPGIEPTGNMVKR.R              |      |
|                       |                     |                   | 549.6299 | K.TGVAVNKPAEFTVDAK.H             |      |
|                       |                     |                   | 430.2316 | R.AYGPGIEPTGNMVKR.A              |      |
|                       |                     |                   | 878.9210 | K.SPFVYVDKSQGDASK.V              |      |
|                       |                     |                   | 586.2851 | K.SPFVYVDKSQGDASK.V              |      |
|                       |                     |                   | 597.2811 | K.ATCAPQHGAPGPGPADASK.V          |      |
|                       |                     |                   | 605.6576 | K.VAQPTITDNKDGTVTVR.Y            |      |
|                       |                     |                   | 623.2861 | R.SPYTVTVGQACNPSACR.A            |      |
|                       |                     |                   | 515.2393 | K.THEAEIVEGENHTYCIR.F            |      |
|                       |                     |                   | 771.7033 | R.SAGQGEVLVYVEDPAGHQEEAK.V       |      |
|                       |                     |                   | 855.7354 | K.AHEPTYFTVDCAEAGQGDVSIK.C       |      |
|                       |                     |                   | 982.5020 | R.FGGEHVPNSPFQVTALAGDQPSVQPPLR.S |      |
|                       |                     |                   | 603.9293 | R.TFSVWYVPEVTGTHKVTVLFAGQHIK.S   |      |
| Actin (cytoplasmic 1) | LN18                | P60709 ACTB_HUMAN | 389.1800 | K.CDVDIR.K                       | 1221 |
|                       |                     |                   | 398.2388 | K.IIAPPER.K                      |      |
|                       |                     |                   | 400.7702 | K.RGILTLK.Y                      |      |
|                       |                     |                   | 488.7261 | K.AGFAGDDAPR.A                   |      |
|                       |                     |                   | 507.7431 | R.DLTDYLMK.I                     |      |
|                       |                     |                   | 566.7653 | R.GYSFTTAEERE                    |      |
|                       |                     |                   | 586.2863 | R.HQCVMVGMGQK.D                  |      |
|                       |                     |                   | 589.3089 | K.EITALAPSTMK.I                  |      |
|                       |                     |                   | 396.5251 | K.DSYVGDEAQS.K.R                 |      |
|                       |                     |                   | 599.7627 | K.DSYVGDEAQS.K.R                 |      |
|                       |                     |                   | 505.9197 | K.IWHHTFYNELR.V                  |      |
|                       |                     |                   | 758.8536 | K.QEYDESGPSIVHR.K                |      |

|                 |       |                     |           |                                    |     |
|-----------------|-------|---------------------|-----------|------------------------------------|-----|
|                 |       |                     | 895.9474  | K.SYELPDGQVITIGNER.F               |     |
|                 |       |                     | 977.5330  | R.VAPEEHPVLLTEAPLNPK.A             |     |
|                 |       |                     | 1108.0349 | K.DLYANTVLSGGTTMYPGIADR.M          |     |
|                 |       |                     | 781.7234  | R.KDLYANTVLSGGTTMYPGIADR.M         |     |
|                 |       |                     | 1275.5862 | K.LCYVALDFEQEMATAASSSSLEK.S        |     |
|                 |       |                     | 936.4388  | K.EKLCYVALDFEQEMATAASSSSLEK.S      |     |
|                 |       |                     | 800.6543  | R.TTGIVMDSGDGVTHTVPIYEGYALPHAILR.L |     |
|                 |       |                     | 1077.8230 | R.CPEALFQPSFLGMESCGIHETTENSIMK.C   |     |
|                 | LN229 | P60709 ACTB_HUMAN   | 389.1811  | K.CDVDIR.K                         |     |
|                 |       |                     | 398.2395  | K.IIAPPER.K                        |     |
|                 |       |                     | 400.7711  | K.RGILTLK.Y                        |     |
|                 |       |                     | 488.7273  | K.AGFAGDDAPRA                      |     |
|                 |       |                     | 499.7463  | R.DLTDYLMK.I                       |     |
|                 |       |                     | 566.7664  | R.GYSFTTTAERE                      |     |
|                 |       |                     | 586.2862  | R.HQGVMMVGMGQK.D                   |     |
|                 |       |                     | 599.7645  | K.DSYVGDEAQSK.R                    |     |
|                 |       |                     | 400.2399  | R.AVFSIVGRPR.H                     |     |
|                 |       |                     | 505.9210  | K.IWHHTFYNELR.V                    |     |
|                 |       |                     | 506.2395  | K.QEYDESGPSIVHR.K                  |     |
|                 |       |                     | 895.9484  | K.SYELPDGQVITIGNER.F               |     |
|                 |       |                     | 652.0254  | R.VAPEEHPVLLTEAPLNPK.A             |     |
|                 |       |                     | 739.0274  | K.DLYANTVLSGGTTMYPGIADR.M          |     |
|                 |       |                     | 850.7290  | K.LCYVALDFEQEMATAASSSSLEK.S        |     |
|                 |       |                     | 796.6578  | R.TTGIVMDSGDGVTHTVPIYEGYALPHAILR.L |     |
| Alpha-actinin-1 | LN18  | H9KV75 H9KV75_HUMAN | 413.2252  | R.LDHIAEK.F                        | 446 |
|                 |       |                     | 432.7431  | K.ALDFIASK.G                       |     |
|                 |       |                     | 405.5303  | K.ASIHEAWTDGK.E                    |     |
|                 |       |                     | 608.3379  | K.LASDLLEWIR.R                     |     |
|                 |       |                     | 693.8884  | R.VGWEQLLTIAR.T                    |     |
|                 |       |                     | 711.3546  | K.GYEEWLLNEIR.R                    |     |
|                 |       |                     | 715.3835  | R.TINEVENQILTR.D                   |     |
|                 |       |                     | 856.4578  | K.LLETIDQLYLEYAK.R                 |     |
|                 | LN229 | H9KV75 H9KV75_HUMAN | 608.3406  | K.LASDLLEWIR.R                     | 229 |
|                 |       |                     | 693.8905  | R.VGWEQLLTIAR.T                    |     |
|                 |       |                     | 715.3848  | R.TINEVENQILTR.D                   |     |
|                 |       |                     | 780.4015  | K.IDQLEGDHLIQEALIFDNK.H            |     |
| Alpha-actinin-4 | LN18  | O43707 ACTN4_HUMAN  | 413.2252  | R.LDHIAEK.F                        | 858 |
|                 |       |                     | 432.7431  | K.ALDFIASK.G                       |     |
|                 |       |                     | 447.7728  | R.EILAIHK.E                        |     |
|                 |       |                     | 503.2541  | K.TIQEMQQK.L                       |     |
|                 |       |                     | 387.1936  | K.STLPDADRER.E                     |     |
|                 |       |                     | 405.5303  | K.ASIHEAWTDGK.E                    |     |
|                 |       |                     | 608.3379  | K.LASDLLEWIR.R                     |     |
|                 |       |                     | 442.5637  | K.RDHALLEEQSK.Q                    |     |
|                 |       |                     | 676.8143  | K.GISQEQMQEFR.A                    |     |
|                 |       |                     | 693.8884  | R.VGWEQLLTIAR.T                    |     |
|                 |       |                     | 711.3546  | K.GYEEWLLNEIR.R                    |     |
|                 |       |                     | 715.3835  | R.TINEVENQILTR.D                   |     |
|                 |       |                     | 478.5765  | R.LSNRPAFMPSEGGK.M                 |     |

|                     |       |                     |           |                                  |      |
|---------------------|-------|---------------------|-----------|----------------------------------|------|
|                     |       |                     | 516.9252  | K.HRDYETATLSDIK.A                |      |
|                     |       |                     | 559.3053  | K.VLAGDKNFITAEELR.R              |      |
|                     |       |                     | 871.4072  | R.ETDITDADQVIASFV.V              |      |
|                     |       |                     | 606.2951  | K.MLDAEDIVNTARPDEK.A             |      |
|                     |       |                     | 640.9803  | K.AGTQIENIDEDFRDGLK.L            |      |
|                     |       |                     | 687.6559  | K.VLAVNQENEHLMEDYEK.L            |      |
|                     | LN229 | O43707 ACTN4_HUMAN  | 608.3406  | K.LASDLLEWIR.R                   | 275  |
|                     |       |                     | 442.5653  | K.RDHALLEEQSK.Q                  |      |
|                     |       |                     | 676.8174  | K.GISQEQMQEFR.A                  |      |
|                     |       |                     | 693.8905  | R.VGWEQLLTIAR.T                  |      |
|                     |       |                     | 715.3848  | R.TINEVENQILTR.D                 |      |
| Tubulin alpha chain | LN18  | F5H5D3 F5H5D3_HUMAN | 391.2062  | R.LSVDYGK.K                      | 1203 |
|                     |       |                     | 444.2190  | K.FDLMYAK.R                      |      |
|                     |       |                     | 453.7144  | R.EDMAALEK.D                     |      |
|                     |       |                     | 455.2540  | R.LSVDYGKK.S                     |      |
|                     |       |                     | 508.2916  | K.DVNAAIATIK.T                   |      |
|                     |       |                     | 512.2263  | K.EDAANNYAR.G                    |      |
|                     |       |                     | 543.3119  | K.EIIDLVLDRI                     |      |
|                     |       |                     | 625.2787  | K.YMACCLLYR.G                    |      |
|                     |       |                     | 460.9025  | R.LDHKFDLMYAK.R                  |      |
|                     |       |                     | 792.8769  | R.SIQFVDWCPTGFK.V                |      |
|                     |       |                     | 851.4533  | R.AVFVDLEPTVIDEVR.T              |      |
|                     |       |                     | 859.9415  | R.NLDIERPTYTNLNR.L               |      |
|                     |       |                     | 878.9824  | R.IHFPLATYAPVISA.EK.A            |      |
|                     |       |                     | 912.9938  | K.VGINYQPPTVVPGGDLAK.V           |      |
|                     |       |                     | 932.9526  | R.AVCMLSNTTAIAEAWAR.L            |      |
|                     |       |                     | 1004.4476 | K.TIGGGDDSFNTFFSETGAGK.H         |      |
|                     |       |                     | 1205.1050 | R.FDGLNVDLTFEQTNLVPYPR.I         |      |
|                     |       |                     | 805.7378  | R.QLFHPEQLITGKEDAANNYAR.G        |      |
|                     |       |                     | 917.4324  | K.AYHEQLSVAEITNACFEPANQMVK.C     |      |
|                     |       |                     | 1079.4381 | R.EDMAALEKDYEEVGVDSVEGEGEEEGEY.- |      |
|                     | LN229 | F5H5D3 F5H5D3_HUMAN | 391.2077  | R.LSVDYGK.K                      | 884  |
|                     |       |                     | 508.2920  | K.DVNAAIATIK.T                   |      |
|                     |       |                     | 512.2283  | K.EDAANNYAR.G                    |      |
|                     |       |                     | 543.3136  | K.EIIDLVLDRI                     |      |
|                     |       |                     | 625.2792  | K.YMACCLLYR.G                    |      |
|                     |       |                     | 460.9036  | R.LDHKFDLMYAK.R                  |      |
|                     |       |                     | 470.9289  | R.QLFHPEQLITGK.E                 |      |
|                     |       |                     | 851.4562  | R.AVFVDLEPTVIDEVR.T              |      |
|                     |       |                     | 573.6321  | R.NLDIERPTYTNLNR.L               |      |
|                     |       |                     | 586.3269  | R.IHFPLATYAPVISA.EK.A            |      |
|                     |       |                     | 912.9976  | K.VGINYQPPTVVPGGDLAK.V           |      |
|                     |       |                     | 1004.4490 | K.TIGGGDDSFNTFFSETGAGK.H         |      |
|                     |       |                     | 803.7405  | R.FDGLNVDLTFEQTNLVPYPR.I         |      |
|                     |       |                     | 922.1043  | K.AYHEQLTVAEITNACFEPANQMVK.C     |      |
| Tubulin alpha-1B    | LN18  | P68363 TBA1B_HUMAN  | 391.2062  | R.LSVDYGK.K                      | 1408 |
|                     |       |                     | 444.2190  | K.FDLMYAK.R                      |      |
|                     |       |                     | 453.7144  | R.EDMAALEK.D                     |      |
|                     |       |                     | 455.2540  | R.LSVDYGKK.S                     |      |

|                  |                    |                    |           |                                  |      |
|------------------|--------------------|--------------------|-----------|----------------------------------|------|
|                  |                    |                    | 508.2916  | K.DVNAAIATIK.T                   |      |
|                  |                    |                    | 512.2263  | K.EDAANNYAR.G                    |      |
|                  |                    |                    | 543.3119  | K.EIIDLVLDRI                     |      |
|                  |                    |                    | 625.2787  | K.YMACCLLYR.G                    |      |
|                  |                    |                    | 460.9025  | R.LDHKFDLMYAK.R                  |      |
|                  |                    |                    | 792.8769  | R.SIQFVDWCPTGFK.V                |      |
|                  |                    |                    | 851.4533  | R.AVFVDEPTVIDEVR.T               |      |
|                  |                    |                    | 859.9415  | R.NLDIERPTYTNLNR.L               |      |
|                  |                    |                    | 878.9824  | R.IHFPLATYAPVISA.EK.A            |      |
|                  |                    |                    | 912.9938  | K.VGINYQPPTVVPGGDLAK.V           |      |
|                  |                    |                    | 932.9526  | R.AVCMLSNTTAIAEAWAR.L            |      |
|                  |                    |                    | 1004.4476 | K.TIGGGDDSFNTFFSETGAGK.H         |      |
|                  |                    |                    | 777.3413  | R.AFVHWYVGEGMEEGEFSEAR.E         |      |
|                  |                    |                    | 1205.1050 | R.FDGALNVDLTEFQTNLVPYPR.I        |      |
|                  |                    |                    | 805.7378  | R.QLFHPEQLITGKEDAANNYAR.G        |      |
|                  |                    |                    | 917.4324  | K.AYHEQLSVAEITNACFEPANQMVK.C     |      |
|                  |                    |                    | 1079.4381 | R.EDMAALEKDYEEVGVDSVEGEGEEEGEY.- |      |
| LN229            | P68363 TBA1B_HUMAN |                    | 388.2092  | R.GHYTIGK.E                      | 1039 |
|                  |                    |                    | 391.2077  | R.LSVDYGK.K                      |      |
|                  |                    |                    | 508.2920  | K.DVNAAIATIK.T                   |      |
|                  |                    |                    | 512.2283  | K.EDAANNYAR.G                    |      |
|                  |                    |                    | 543.3136  | K.EIIDLVLDRI                     |      |
|                  |                    |                    | 625.2792  | K.YMACCLLYR.G                    |      |
|                  |                    |                    | 460.9036  | R.LDHKFDLMYAK.R                  |      |
|                  |                    |                    | 470.9289  | R.QLFHPEQLITGK.E                 |      |
|                  |                    |                    | 792.8789  | R.SIQFVDWCPTGFK.V                |      |
|                  |                    |                    | 851.4562  | R.AVFVDEPTVIDEVR.T               |      |
|                  |                    |                    | 573.6321  | R.NLDIERPTYTNLNR.L               |      |
|                  |                    |                    | 586.3269  | R.IHFPLATYAPVISA.EK.A            |      |
|                  |                    |                    | 912.9976  | K.VGINYQPPTVVPGGDLAK.V           |      |
|                  |                    |                    | 932.9543  | R.AVCMLSNTTAIAEAWAR.L            |      |
|                  |                    |                    | 1004.4490 | K.TIGGGDDSFNTFFSETGAGK.H         |      |
|                  |                    |                    | 803.7405  | R.FDGALNVDLTEFQTNLVPYPR.I        |      |
|                  |                    |                    | 917.4354  | K.AYHEQLSVAEITNACFEPANQMVK.C     |      |
| Tubulin alpha-4A | LN18               | P68366 TBA4A_HUMAN | 391.2062  | R.LSVDYGK.K                      | 1077 |
|                  |                    |                    | 444.2190  | K.FDLMYAK.R                      |      |
|                  |                    |                    | 453.7144  | R.EDMAALEK.D                     |      |
|                  |                    |                    | 455.2540  | R.LSVDYGKK.S                     |      |
|                  |                    |                    | 512.2263  | K.EDAANNYAR.G                    |      |
|                  |                    |                    | 535.2969  | K.EIIDPVLDRI                     |      |
|                  |                    |                    | 625.2787  | K.YMACCLLYR.G                    |      |
|                  |                    |                    | 460.9025  | R.LDHKFDLMYAK.R                  |      |
|                  |                    |                    | 792.8769  | R.SIQFVDWCPTGFK.V                |      |
|                  |                    |                    | 859.9415  | R.NLDIERPTYTNLNR.L               |      |
|                  |                    |                    | 878.9824  | R.IHFPLATYAPVISA.EK.A            |      |
|                  |                    |                    | 912.9938  | K.VGINYQPPTVVPGGDLAK.V           |      |
|                  |                    |                    | 932.9526  | R.AVCMLSNTTAIAEAWAR.L            |      |
|                  |                    |                    | 777.3413  | R.AFVHWYVGEGMEEGEFSEAR.E         |      |
|                  |                    |                    | 1205.1050 | R.FDGALNVDLTEFQTNLVPYPR.I        |      |

|                |                                   |                   |                |                                   |          |                   |                  |               |      |
|----------------|-----------------------------------|-------------------|----------------|-----------------------------------|----------|-------------------|------------------|---------------|------|
| Tubulin beta   | LN18                              | P07437 TBB5_HUMAN | 805.7378       | R.QLFHPEQLITGKEDAANNYAR.G         | 1364     |                   |                  |               |      |
|                |                                   |                   | 917.4324       | K.AYHEQLSVAEITNACFEPANQMVK.C      |          |                   |                  |               |      |
|                |                                   |                   | 514.7613       | K.TAVCDIPPR.G                     |          |                   |                  |               |      |
|                |                                   |                   | 520.2991       | R.YLTVAAVFR.G                     |          |                   |                  |               |      |
|                |                                   |                   | 533.2160       | K.NMMAACDPR.H                     |          |                   |                  |               |      |
|                |                                   |                   | 539.2678       | K.IREEYPDR.I                      |          |                   |                  |               |      |
|                |                                   |                   | 565.7998       | R.FPGQLNADLR.K                    |          |                   |                  |               |      |
|                |                                   |                   | 580.3170       | K.LAVNMVPPFR.L                    |          |                   |                  |               |      |
|                |                                   |                   | 615.3007       | R.ISEQFTAMFR.R                    |          |                   |                  |               |      |
|                |                                   |                   | 420.2336       | R.FPGQLNADLRK.L                   |          |                   |                  |               |      |
|                |                                   |                   | 651.3197       | R.ISVYYNEATGGK.Y                  |          |                   |                  |               |      |
|                |                                   |                   | 660.3536       | R.IMNTFSVVPSPK.V                  |          |                   |                  |               |      |
|                |                                   |                   | 723.8456       | K.EVDEQMLNVQNK.N                  |          |                   |                  |               |      |
|                |                                   |                   | 808.4189       | R.AILVDLEPGTMDSVR.S               |          |                   |                  |               |      |
|                |                                   |                   | 540.9487       | R.LHFFMPGFAPLTSR.G                |          |                   |                  |               |      |
|                |                                   |                   | 830.4487       | R.ALTVPELTQQVFDK.N                |          |                   |                  |               |      |
|                |                                   |                   | 848.9175       | K.NSSYFVEWIPNNVK.T                |          |                   |                  |               |      |
|                |                                   |                   | 911.9622       | R.EIVHIQAGQCGNQIGAK.F             |          |                   |                  |               |      |
|                |                                   |                   | 935.4907       | K.MAVTFIGNSTAIQELFK.R             |          |                   |                  |               |      |
|                |                                   |                   | 979.9920       | K.GHYTEGAELVDSVLDVVR.K            |          |                   |                  |               |      |
|                |                                   |                   | 933.7769       | R.SGPFQIFRPDNFVFGQSGAGNNWAK.G     |          |                   |                  |               |      |
|                |                                   |                   | 1034.8059      | K.FWEVISDEHGIDPTGTYHGSDQLDR.I     |          |                   |                  |               |      |
|                |                                   |                   | 1104.5138      | K.EAESCDCLQGFQLTHSLGGGTGSGMGTLISK |          |                   |                  |               |      |
|                |                                   |                   | 1149.2805      | K.VSDTVVEPYNATLSVHQLVENTDETYCIDNE |          |                   |                  |               |      |
|                |                                   |                   | Tubulin beta-3 | LN229                             |          | P07437 TBB5_HUMAN | 514.7639         | K.TAVCDIPPR.G | 1028 |
|                |                                   |                   |                |                                   |          |                   | 520.3002         | R.YLTVAAVFR.G |      |
|                |                                   |                   |                |                                   |          |                   | 533.2171         | K.NMMAACDPR.H |      |
| 539.2700       | K.IREEYPDR.I                      |                   |                |                                   |          |                   |                  |               |      |
| 565.8015       | R.FPGQLNADLR.K                    |                   |                |                                   |          |                   |                  |               |      |
| 572.3225       | K.LAVNMVPPFR.L                    |                   |                |                                   |          |                   |                  |               |      |
| 615.3035       | R.ISEQFTAMFR.R                    |                   |                |                                   |          |                   |                  |               |      |
| 424.5810       | R.KLAVNMVPPFR.L                   |                   |                |                                   |          |                   |                  |               |      |
| 651.3218       | R.ISVYYNEATGGK.Y                  |                   |                |                                   |          |                   |                  |               |      |
| 660.3549       | R.IMNTFSVVPSPK.V                  |                   |                |                                   |          |                   |                  |               |      |
| 816.4207       | R.AILVDLEPGTMDSVR.S               |                   |                |                                   |          |                   |                  |               |      |
| 830.4508       | R.ALTVPELTQQVFDK.N                |                   |                |                                   |          |                   |                  |               |      |
| 608.3121       | R.EIVHIQAGQCGNQIGAK.F             |                   |                |                                   |          |                   |                  |               |      |
| 935.4925       | K.MAVTFIGNSTAIQELFK.R             |                   |                |                                   |          |                   |                  |               |      |
| 653.6652       | K.GHYTEGAELVDSVLDVVR.K            |                   |                |                                   |          |                   |                  |               |      |
| 776.3545       | K.FWEVISDEHGIDPTGTYHGSDQLDR.I     |                   |                |                                   |          |                   |                  |               |      |
| 1104.5167      | K.EAESCDCLQGFQLTHSLGGGTGSGMGTLISK |                   |                |                                   |          |                   |                  |               |      |
| 1149.2822      | K.VSDTVVEPYNATLSVHQLVENTDETYCIDNE |                   |                |                                   |          |                   |                  |               |      |
| Tubulin beta-3 | LN18                              | Q13509 TBB3_HUMAN |                |                                   | 533.2160 |                   | K.NMMAACDPR.H    | 860           |      |
|                |                                   |                   |                |                                   | 565.7998 |                   | R.FPGQLNADLR.K   |               |      |
|                |                                   |                   |                |                                   | 580.3170 |                   | K.LAVNMVPPFR.L   |               |      |
|                |                                   |                   |                |                                   | 615.3007 |                   | R.ISEQFTAMFR.R   |               |      |
|                |                                   |                   |                |                                   | 420.2336 |                   | R.FPGQLNADLRK.L  |               |      |
|                |                                   |                   |                |                                   | 660.3536 |                   | R.IMNTFSVVPSPK.V |               |      |
|                |                                   |                   |                |                                   | 695.8445 |                   | K.EVDEQMLAIQSK.N |               |      |



|                 |       |                    |           |                                  |      |
|-----------------|-------|--------------------|-----------|----------------------------------|------|
|                 |       |                    | 808.4189  | R.AILVDLEPGTMDSVR.S              |      |
|                 |       |                    | 846.4347  | R.ALTVPELTQQMFDK.N               |      |
|                 |       |                    | 848.9175  | K.NSSYFVEWIPNNVK.V               |      |
|                 |       |                    | 911.9622  | R.EIVHIQAGQCGNQIGAK.F            |      |
|                 |       |                    | 979.9920  | K.GHYTEGAELVDSVLDVVR.K           |      |
|                 |       |                    | 1026.4730 | K.FWEVISDEHGIDPSGNYVGSDLQLER.I   |      |
|                 | LN229 | Q13509 TBB3_HUMAN  | 533.2171  | K.NMMAACDPR.H                    | 644  |
|                 |       |                    | 565.8015  | R.FPGQLNADLR.K                   |      |
|                 |       |                    | 572.3225  | K.LAVNMVPPFR.L                   |      |
|                 |       |                    | 615.3035  | R.ISEQFTAMFR.R                   |      |
|                 |       |                    | 424.5810  | R.KLAVNMVPPFR.L                  |      |
|                 |       |                    | 660.3549  | R.IMNTFSVVPSPK.V                 |      |
|                 |       |                    | 695.8459  | K.EVDEQMLAIQSK.N                 |      |
|                 |       |                    | 466.5609  | R.ISVYYNEASSHK.Y                 |      |
|                 |       |                    | 816.4207  | R.AILVDLEPGTMDSVR.S              |      |
|                 |       |                    | 846.4385  | R.ALTVPELTQQMFDK.N               |      |
|                 |       |                    | 608.3121  | R.EIVHIQAGQCGNQIGAK.F            |      |
|                 |       |                    | 653.6652  | K.GHYTEGAELVDSVLDVVR.K           |      |
| Tubulin beta-4B | LN18  | P68371 TBB4B_HUMAN | 514.7613  | K.TAVCDIPPR.G                    | 1208 |
|                 |       |                    | 520.2991  | R.YLTVAAVFR.G                    |      |
|                 |       |                    | 533.2160  | K.NMMAACDPR.H                    |      |
|                 |       |                    | 539.2678  | K.IREEYPDR.I                     |      |
|                 |       |                    | 565.7998  | R.FPGQLNADLR.K                   |      |
|                 |       |                    | 580.3170  | K.LAVNMVPPFR.L                   |      |
|                 |       |                    | 615.3007  | R.ISEQFTAMFR.R                   |      |
|                 |       |                    | 420.2336  | R.FPGQLNADLRK.L                  |      |
|                 |       |                    | 660.3536  | R.IMNTFSVVPSPK.V                 |      |
|                 |       |                    | 664.8255  | R.INVYYNEATGGK.Y                 |      |
|                 |       |                    | 723.8456  | K.EVDEQMLNVQNK.N                 |      |
|                 |       |                    | 801.4119  | R.AVLVDLEPGTMDSVR.S              |      |
|                 |       |                    | 846.4347  | R.ALTVPELTQQMFDK.N               |      |
|                 |       |                    | 848.9175  | K.NSSYFVEWIPNNVK.T               |      |
|                 |       |                    | 911.9622  | R.EIVHLQAGQCGNQIGAK.F            |      |
|                 |       |                    | 979.9920  | K.GHYTEGAELVDSVLDVVR.K           |      |
|                 |       |                    | 933.7769  | R.SGPFQQIFRPDNFVFGQSGAGNNWAK.G   |      |
|                 |       |                    | 1104.5138 | K.EAESCDLQGFQLTHSLGGGTGSGMGTLISK |      |
|                 | LN229 | P68371 TBB4B_HUMAN | 514.7639  | K.TAVCDIPPR.G                    | 858  |
|                 |       |                    | 520.3002  | R.YLTVAAVFR.G                    |      |
|                 |       |                    | 533.2171  | K.NMMAACDPR.H                    |      |
|                 |       |                    | 539.2700  | K.IREEYPDR.I                     |      |
|                 |       |                    | 565.8015  | R.FPGQLNADLR.K                   |      |
|                 |       |                    | 572.3225  | K.LAVNMVPPFR.L                   |      |
|                 |       |                    | 615.3035  | R.ISEQFTAMFR.R                   |      |
|                 |       |                    | 424.5810  | R.KLAVNMVPPFR.L                  |      |
|                 |       |                    | 660.3549  | R.IMNTFSVVPSPK.V                 |      |
|                 |       |                    | 664.8265  | R.INVYYNEATGGK.Y                 |      |
|                 |       |                    | 846.4385  | R.ALTVPELTQQMFDK.N               |      |
|                 |       |                    | 608.3121  | R.EIVHLQAGQCGNQIGAK.F            |      |
|                 |       |                    | 653.6652  | K.GHYTEGAELVDSVLDVVR.K           |      |

|                |      |                   |           |                                   |     |
|----------------|------|-------------------|-----------|-----------------------------------|-----|
| Tubulin beta-6 | LN18 | Q9BUF5 TBB6_HUMAN | 779.8595  | K.FWEVISDEHGIDPTGTYHGSDQLQER.I    | 553 |
|                |      |                   | 1104.5167 | K.EAESCDCLQGFQLTHSLGGTCSGGMGTLISK |     |
|                |      |                   | 533.2160  | R.NMMAACDPR.H                     |     |
|                |      |                   | 565.7998  | R.FPGQLNADLR.K                    |     |
|                |      |                   | 580.3170  | K.LAVNMVPPR.L                     |     |
|                |      |                   | 608.2931  | R.ISEQFSAMFR.R                    |     |
|                |      |                   | 420.2336  | R.FPGQLNADLRK.L                   |     |
|                |      |                   | 695.8445  | K.EVDEQMLAIQSK.N                  |     |
|                |      |                   | 540.9487  | R.LHFFMPGFAPLTSR.G                |     |
|                |      |                   | 848.9175  | K.NSSYFVEWIPNNVK.V                |     |
|                |      |                   | 648.3321  | K.GHYTEGAELVDAVLDVVR.K            |     |
|                |      |                   | 987.4709  | K.FWEVISDEHGIDPAGGYVGDSALQER.I    |     |
|                |      |                   | 1149.2805 | K.VSDTVVEPYNATLSVHQLVENTDETYCIDNE |     |

---

*Stress-related*

---

|       |           |                        |           |                        |     |          |              |
|-------|-----------|------------------------|-----------|------------------------|-----|----------|--------------|
| GRP78 | LN18      | P11021 GRP78_HUMAN     | 459.7413  | K.VLESDLK.K            | 900 |          |              |
|       |           |                        | 493.7597  | R.LTPEEIER.M           |     |          |              |
|       |           |                        | 537.7788  | K.IITINDQNR.L          |     |          |              |
|       |           |                        | 596.3193  | K.VYEGERPLTK.D         |     |          |              |
|       |           |                        | 609.3172  | K.DAGTIAGLNVMR.I       |     |          |              |
|       |           |                        | 414.2115  | K.MKETAEAYLGK.K        |     |          |              |
|       |           |                        | 658.8211  | R.NELESYAYSLK.N        |     |          |              |
|       |           |                        | 699.3958  | K.ELEEIVQPIISK.L       |     |          |              |
|       |           |                        | 730.8839  | K.SDIDEIVLVGGSTR.I     |     |          |              |
|       |           |                        | 768.9004  | K.TFAPEEISAMVLT.M      |     |          |              |
|       |           |                        | 783.8927  | R.ITPSYVAFTPEGER.L     |     |          |              |
|       |           |                        | 830.4487  | R.IINEPTAAAIAYGLDK.R   |     |          |              |
|       |           |                        | 839.4035  | K.NQLTSNPENTVFDK.R     |     |          |              |
|       |           |                        | 658.9720  | K.IEWLESHQDADIEDFK.A   |     |          |              |
|       |           |                        | 1082.9957 | R.IEIESFYEGEDFSETLTR.A |     |          |              |
|       |           |                        | LN229     | P11021 GRP78_HUMAN     |     | 459.7419 | K.VLESDLK.K  |
|       |           |                        |           |                        |     | 493.7611 | R.LTPEEIER.M |
|       | 537.7805  | K.IITINDQNR.L          |           |                        |     |          |              |
|       | 596.3223  | K.VYEGERPLTK.D         |           |                        |     |          |              |
|       | 404.5279  | K.EFFNGKEPSR.G         |           |                        |     |          |              |
|       | 609.3186  | K.DAGTIAGLNVMR.I       |           |                        |     |          |              |
|       | 614.8174  | R.VEIIANDQGNRI         |           |                        |     |          |              |
|       | 414.2129  | K.MKETAEAYLGK.K        |           |                        |     |          |              |
|       | 657.3133  | K.FEELNMDLFR.S         |           |                        |     |          |              |
|       | 658.8223  | R.NELESYAYSLK.N        |           |                        |     |          |              |
|       | 730.8842  | K.SDIDEIVLVGGSTR.I     |           |                        |     |          |              |
|       | 504.9229  | R.AKFEELNMDLFR.S       |           |                        |     |          |              |
|       | 768.9021  | K.TFAPEEISAMVLT.M      |           |                        |     |          |              |
|       | 783.8944  | R.ITPSYVAFTPEGER.L     |           |                        |     |          |              |
|       | 830.4517  | R.IINEPTAAAIAYGLDK.R   |           |                        |     |          |              |
|       | 839.4060  | K.NQLTSNPENTVFDK.R     |           |                        |     |          |              |
|       | 918.9691  | K.SQIFSTASDNQPTVTIK.V  |           |                        |     |          |              |
|       | 1082.9978 | R.IEIESFYEGEDFSETLTR.A |           |                        |     |          |              |

|                                    |        |                             |          |                             |       |
|------------------------------------|--------|-----------------------------|----------|-----------------------------|-------|
| G3P                                | LN18   | P04406 G3P_HUMAN            |          | <i>See GAPDH<br/>above</i>  | 792   |
|                                    | /LN229 |                             |          |                             | /881  |
| <b><i>GBM-invasion related</i></b> |        |                             |          |                             |       |
| STIM1L                             | LN18   | G0XQ39 G0XQ39_HUMAN         | 579.8253 | K.QALSEVTAALRE              | 53    |
|                                    | LN229  | G0XQ39 G0XQ39_HUMAN         | 579.8273 | K.QALSEVTAALRE              | 130   |
|                                    |        |                             | 56.9416  | K.ALDTVLFQPLLTR.H           |       |
| Moesin                             | LN18   | P26038 MOES_HUMAN           | 417.2405 | K.ESPLLFK.F                 | 196   |
|                                    |        |                             | 488.7751 | K.QLFDQVVK.T                |       |
|                                    |        |                             | 591.7991 | K.APDFVIFYAPR.L             |       |
|                                    |        |                             | 617.2883 | K.ESEAVEWQQK.A              |       |
|                                    |        |                             | 491.5996 | R.RKPDITIEVQQM.K            |       |
|                                    |        |                             | 694.6724 | K.FYPEDVSEELIQDITQR.L       |       |
| Annexin A1                         | LN229  | P04083 ANXA1_HUMAN          | 454.7273 | R.ALYEAGER.R                | 223   |
|                                    |        |                             | 775.9124 | K.GTDVNVFNTILTRS            |       |
|                                    |        |                             | 851.9451 | K.GLGTDEDTLIEILASR.T        |       |
|                                    |        |                             | 786.0572 | K.GGPGSAVSPYPTFNPSDVAALHK.A |       |
| Cathepsin D                        | LN18   | A0A1B0GV23 A0A1B0GV23_HUMAN | 440.2315 | R.QVFGAATK.Q                | 30/35 |
|                                    | LN229  | A0A1B0GV23 A0A1B0GV23_HUMAN | 521.8289 | K.VSTLPAITLK.L              |       |
| GAPDH                              | LN18/  | P04406 G3P_HUMAN            |          | <i>see GAPDH<br/>above</i>  | 792/  |
|                                    | LN229  |                             |          |                             | 881   |
| Integrin beta-1                    | LN229  | Q5T3E6 Q5T3E6_HUMAN         | 554.2880 | R.SGEPQTFLLK.F              | 108   |
|                                    |        |                             | 673.7234 | K.LKPEDITQIQPQQLVLR.L       |       |

<sup>1</sup> Ions score is  $-10 \cdot \log(P)$ , where P is the probability that the observed match is a random event. Individual ions scores  $>28$  indicate identity or extensive homology ( $p < 0.05$ ). Protein scores are derived from ions scores as a non-probabilistic basis for ranking protein hits. Cut-off was set at Ions score 20.

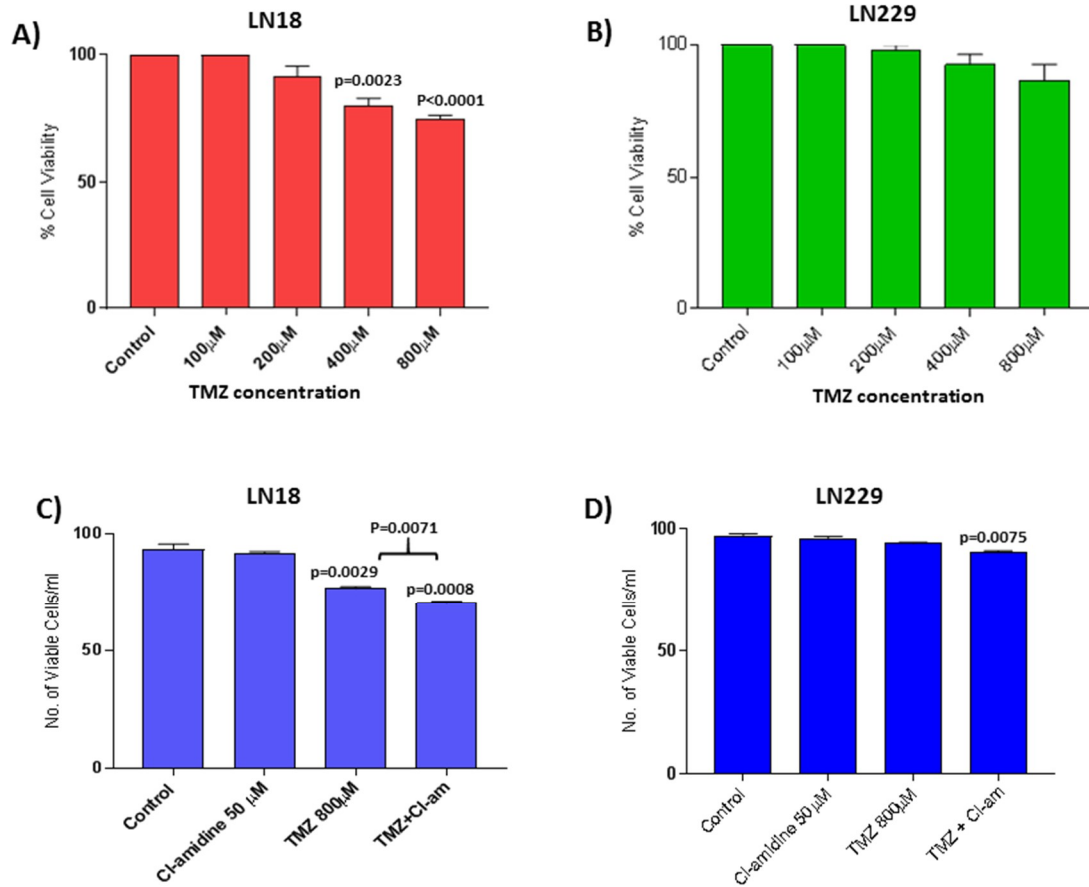

**Figure S1.** GBM cell viability after 1 h incubation with Cl-amidine, TMZ and Cl-amidine in combination with TMZ. **(A,B)** Viability of GBM cells LN18 and LN229 was assessed after 1 h incubation with 100–800  $\mu$ M TMZ; **(A)** LN18 cells showed a 15% decrease in viability at 400  $\mu$ M and 23% decrease in viability at 800  $\mu$ M TMZ respectively; **(B)** LN229 showed non-significant 5% decrease in cell viability in the presence of 800  $\mu$ M TMZ, compared to DMSO treated control cells. **(C)** LN18 viability was not significantly affected by Cl-amidine alone, while TMZ-Cl-amidine combinatory treatment caused a 24.7% reduction in cell viability. **(D)** LN229 viability was not significantly affected by Cl-amidine alone but was reduced by 7.22% after 1 h incubation with TMZ-Cl-amidine combinatory treatment.
